# Supplementary material
Source: Elsevier journal article supplement (https://www.sciencedirect.com/science/article/pii/S0210569117303376)
Supplement: mmc1 [file S0210569117303376:mmc1.pdf]

## ANEXO 5: Encuesta percepción personal

### CUESTIONARIO

**Buenos días/tardes, un grupo de investigación del Complejo Hospitalario Universitario Insular-Materno Infantil y de la Universidad de Las Palmas de Gran Canaria está realizando un estudio sobre los planes de Autoprotección para hacer frente a una evacuación en las Unidades de Cuidados Intensivos (UCI) de Canarias. A este respecto, le agradecemos de antemano su contribución en esta investigación. Toda la información será usada únicamente con ese fin y se tratará con carácter anónimo.**

|                     |  |
|---------------------|--|
| Nº CUESTIONARIO (1) |  |
|---------------------|--|

**P1.** En la siguiente tabla se recoge una serie de afirmaciones relacionadas con la preparación de los hospitales para hacer frente a situaciones de emergencia interna que pudieran requerir de una posible evacuación. Por favor, exprese su grado de acuerdo con cada una de ellas teniendo en cuenta que el 1 significa “totalmente en desacuerdo” y el 7 “totalmente de acuerdo”. (2-16)

| AFIRMACIONES                                                                                                                                                                               | VALORACIÓN |   |   |   |   |   |   |
|--------------------------------------------------------------------------------------------------------------------------------------------------------------------------------------------|------------|---|---|---|---|---|---|
| El hospital en el que trabajo está adecuadamente preparado para hacer frente a situaciones de emergencia interna que pudiera requerir de una posible evacuación                            | 1          | 2 | 3 | 4 | 5 | 6 | 7 |
| La Unidad de Cuidados Intensivos (UCI) en la que trabajo está adecuadamente preparada para hacer frente a situaciones de emergencia interna que pudiera requerir de una posible evacuación | 1          | 2 | 3 | 4 | 5 | 6 | 7 |
| Los hospitales y las UCI deberían tener planes asistenciales para llevar a cabo una evacuación                                                                                             | 1          | 2 | 3 | 4 | 5 | 6 | 7 |
| El hospital en el que trabajo tiene planes asistenciales para llevar a cabo una evacuación                                                                                                 | 1          | 2 | 3 | 4 | 5 | 6 | 7 |
| La Unidad de Cuidados Intensivos (UCI) en la que trabajo tiene planes asistenciales para llevar a cabo una evacuación                                                                      | 1          | 2 | 3 | 4 | 5 | 6 | 7 |
| Los planes asistenciales para llevar a cabo una evacuación deberían ser actualizados                                                                                                       | 1          | 2 | 3 | 4 | 5 | 6 | 7 |
| El hospital en el que trabajo actualiza los planes asistenciales para llevar a cabo una evacuación                                                                                         | 1          | 2 | 3 | 4 | 5 | 6 | 7 |
| La Unidad de Cuidados Intensivos (UCI) en la que trabajo actualiza los planes asistenciales para llevar a cabo una evacuación                                                              | 1          | 2 | 3 | 4 | 5 | 6 | 7 |
| Es poco probable que el hospital en el que trabajo se vea obligado a realizar una evacuación                                                                                               | 1          | 2 | 3 | 4 | 5 | 6 | 7 |
| La planificación de los planes de evacuación corresponde únicamente a la gerencia y a los jefes de servicio                                                                                | 1          | 2 | 3 | 4 | 5 | 6 | 7 |
| El personal de mi categoría profesional no necesita saber sobre planes de actuación en caso de evacuación                                                                                  | 1          | 2 | 3 | 4 | 5 | 6 | 7 |
| Los trabajadores del hospital en el que trabajo participan en el desarrollo o revisión de los planes de evacuación                                                                         | 1          | 2 | 3 | 4 | 5 | 6 | 7 |
| Todos los trabajadores necesitan entrenamiento y formación para poder gestionar adecuadamente las situaciones en las que sea preciso llevar a cabo una evacuación                          | 1          | 2 | 3 | 4 | 5 | 6 | 7 |
| El hospital en el que trabajo hace los cursos necesarios de formación específica para formar a sus trabajadores ante situaciones de evacuación                                             | 1          | 2 | 3 | 4 | 5 | 6 | 7 |
| El hospital en el que trabajo realiza frecuentemente simulacros/ejercicios para valorar la respuesta ante una evacuación                                                                   | 1          | 2 | 3 | 4 | 5 | 6 | 7 |

**P2.** A continuación le voy a formular una serie de cuestiones con las que se pretende conocer en qué medida el Hospital o la UCI han preparado a su personal para llevar a cabo una evacuación. Por favor, exprese su grado de acuerdo con cada una de ellas teniendo en cuenta que el 1 significa “totalmente en desacuerdo” y el 7 “totalmente de acuerdo”. (17-23)

| AFIRMACIONES                                                                                                                   | VALORACIÓN |   |   |   |   |   |   |
|--------------------------------------------------------------------------------------------------------------------------------|------------|---|---|---|---|---|---|
| Conozco el contenido de los planes existentes de Autoprotección para hacer frente a una evacuación en mi Hospital              | 1          | 2 | 3 | 4 | 5 | 6 | 7 |
| Conozco el contenido de los planes existentes de Autoprotección para hacer frente a una evacuación en la UCI en la que trabajo | 1          | 2 | 3 | 4 | 5 | 6 | 7 |
| Conozco las funciones que debo cumplir si fuera preciso llevar a cabo una evacuación del Hospital                              | 1          | 2 | 3 | 4 | 5 | 6 | 7 |
| Sé dónde poder localizar los planes de Autoprotección del hospital en el que trabajo para hacer frente a una evacuación        | 1          | 2 | 3 | 4 | 5 | 6 | 7 |
| Sé dónde poder localizar los planes de evacuación existentes en la UCI en la que trabajo                                       | 1          | 2 | 3 | 4 | 5 | 6 | 7 |
| Estoy familiarizado con los preparativos/actividades a llevar a cabo si fuera preciso una evacuación                           | 1          | 2 | 3 | 4 | 5 | 6 | 7 |

| AFIRMACIONES                                                                | VALORACION |   |   |   |   |   |   |
|-----------------------------------------------------------------------------|------------|---|---|---|---|---|---|
| Sé cómo actuar en el caso de que fuera preciso llevar a cabo una evacuación | 1          | 2 | 3 | 4 | 5 | 6 | 7 |

**P3.** Si se produjera un incendio en alguna zona de la UCI, ¿conoce usted dónde se cierra la entrada general de gases medicinales? (24)

Sí.....1  
No .....2

**P4.** ¿Su UCI dispone de un contenedor de medicación de emergencia preparado ante una posible evacuación? (25)

Sí.....1 -> ¿Conoce dónde se encuentra? (26)

Sí.....1  
No .....2

No .....2

**P5.** ¿Conoce la ruta de evacuación que tiene que seguir ante la evacuación de la UCI? (27)

Sí.....1  
No .....2

**P6.** ¿Dispone su UCI de algún sistema (triage) que establezca un orden de salida de los pacientes ante una evacuación? (28)

Sí.....1  
No .....2

**P7.** En el último año, ¿ha participado en el desarrollo o revisión de los planes de Autoprotección del hospital en el que trabaja? (29)

Sí.....1 -> ¿Cuál fue su función?: (30) \_\_\_\_\_  
No .....2

**P8.** En el último año, ¿ha participado en el desarrollo o revisión de los planes de Autoprotección de la UCI en la que trabaja? (31)

Sí.....1 -> ¿Cuál fue su función? (32) \_\_\_\_\_  
No .....2

**P9.** En el último año, ¿ha participado en algún simulacro/ejercicio para valorar la respuesta ante una posible evacuación? (33)

Sí.....1 -> ¿Cuál fue su función?: (34) \_\_\_\_\_  
No .....2

**P10.** En el último año, ¿el hospital ha impartido algún curso de formación dirigido a su personal para instruirle sobre los planes de evacuación? (35)

Sí.....1 -> ¿Ha asistido? (36)  
Sí.....1  
No .....2  
No .....2

**P11.** ¿Podría recomendar alguna mejora en la preparación de una evacuación en su hospital o UCI? (37)

Sí.....1 -> ¿Cuál? (38-39) \_\_\_\_\_  
No .....2

**P12.** De la relación de posibles alternativas a utilizar para recibir formación sobre los preparativos de una evacuación, por favor, marque los dos métodos que usted prefiere. (40-41)

Cursos presenciales.....1  
Cursos on line.....2  
CD/DVD.....3

Material escrito.....4  
Otros (Indicar):.....5

**P13.** Utilizando la misma escala de valoración de 1 a 7, por favor, indique su grado de acuerdo con las siguientes afirmaciones. (42--48)

| AFIRMACIONES                                                                               | VALORACIÓN |   |   |   |   |   |   |
|--------------------------------------------------------------------------------------------|------------|---|---|---|---|---|---|
| En general, estoy muy satisfecho con el hospital en el que trabajo                         | 1          | 2 | 3 | 4 | 5 | 6 | 7 |
| En general, estoy muy satisfecho con la UCI en la que trabajo                              | 1          | 2 | 3 | 4 | 5 | 6 | 7 |
| Me gustaría permanecer en UCI durante toda mi carrera profesional                          | 1          | 2 | 3 | 4 | 5 | 6 | 7 |
| Me siento orgulloso de trabajar en la UCI                                                  | 1          | 2 | 3 | 4 | 5 | 6 | 7 |
| Siento un fuerte sentimiento de pertenencia a la UCI                                       | 1          | 2 | 3 | 4 | 5 | 6 | 7 |
| Disfruto hablando de la UCI con gente ajena a esta unidad                                  | 1          | 2 | 3 | 4 | 5 | 6 | 7 |
| Pienso que no podría fácilmente llegar a estar tan comprometido con otra UCI como con ésta | 1          | 2 | 3 | 4 | 5 | 6 | 7 |

#### DATOS DE CLASIFICACIÓN

- P14. Género: (49)**      **P15. Edad: (50)**      **P16. ¿Cuáles son los estudios de mayor nivel que ha completado? (51)**
- |              |                      |                                                                            |
|--------------|----------------------|----------------------------------------------------------------------------|
| Hombre.....1 | 21-25 años.....1     | Sin estudios.....1                                                         |
| Mujer.....2  | 26-30 años.....2     | Primaria o ESO (ESO, FP1, EGB).....2                                       |
|              | 31-35 años.....3     | Bachillero FP2.....3                                                       |
|              | 36-40 años.....4     | Universitarios medios (Diplomaturas).....4                                 |
|              | 41-45 años.....5     | Universitarios superiores (Licenciados, Grados y Cursos de expertos).....5 |
|              | 46-50 años.....6     | Posgrados universitarios (Másteres universitarios y Doctorados).....6      |
|              | 51-55 años.....7     |                                                                            |
|              | 56-60 años.....8     |                                                                            |
|              | Más de 60 años.....9 |                                                                            |
- P17. Hospital en el que trabaja (marca sólo la respuesta del Hospital al que se ha referido en las preguntas anteriores): (52-53)**
- Público.....1 → ¿A Cuál? \_\_\_\_\_  
Privado.....2 → ¿A Cuál? \_\_\_\_\_
- P18. Puesto que ocupa: (54)**      **P19. Experiencia laboral en Hospital: (55)**      **P20. Experiencia laboral en UCI: (56)**
- |                              |                       |                       |
|------------------------------|-----------------------|-----------------------|
| Médico especialista.....1    | Menos de 1 año .....1 | Menos de 1 año .....1 |
| Médico residente.....2       | 1-5 años.....2        | 1-5 años.....2        |
| Enfermero/a.....3            | 6-10 años.....3       | 6-10 años.....3       |
| Auxiliar de enfermería.....4 | 11-15 años.....4      | 11-15 años.....4      |
| Celador/a.....5              | 16-20 años.....5      | 16-20 años.....5      |
| Administrativos.....6        | Más de 20 años.....6  | Más de 20 años.....6  |

**MUCHAS GRACIAS POR SU COLABORACIÓN**
